# Supplementary material for: Genotype-Tailored ERK/MAPK Pathway and HDAC Inhibition Rewires the Apoptotic Rheostat to Trigger Colorectal Cancer Cell Death
Source: PubMed Central journal article supplement — Mol Cancer Ther. 2022 Nov 7;22(1):52–62. doi: 10.1158/1535-7163.MCT-22-0101 (PMC9808369; doi:10.1158/1535-7163.mct-22-0101), 2022-11-07
Supplement: mct-22-0101_figure_s2_suppsf2.pdf [file mct-22-0101_figure_s2_suppsf2.pdf]

**Figure S2**

**HCT 116**

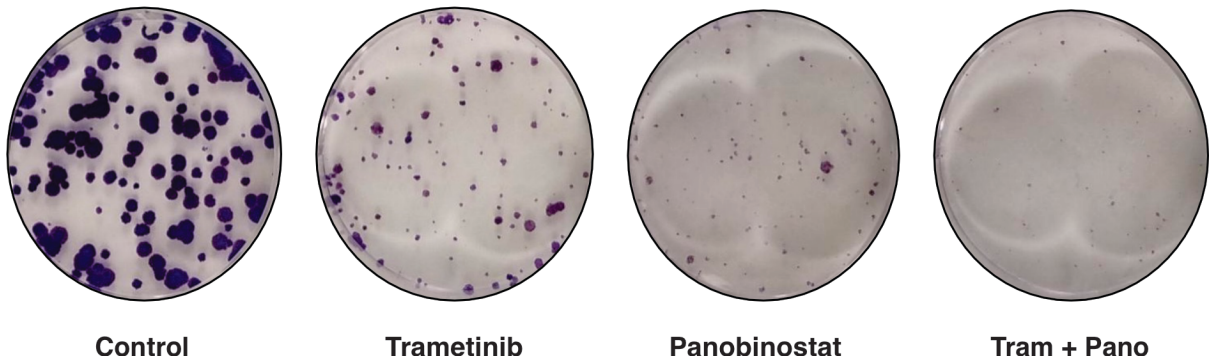

**Figure S2. MEK/HDAC inhibition decreases clonogenic capacity.** Representative images of HCT 116 cells seeded at low density and treated with trametinib (10 nM) alone and panobinostat (25 nM) alone and in combination and allowed to form colonies over 2 weeks.
