# Supplementary material for: Genotype-Tailored ERK/MAPK Pathway and HDAC Inhibition Rewires the Apoptotic Rheostat to Trigger Colorectal Cancer Cell Death
Source: PubMed Central journal article supplement — Mol Cancer Ther. 2022 Nov 7;22(1):52–62. doi: 10.1158/1535-7163.MCT-22-0101 (PMC9808369; doi:10.1158/1535-7163.mct-22-0101), 2022-11-07
Supplement: mct-22-0101_figure_s3_suppsf3.pdf [file mct-22-0101_figure_s3_suppsf3.pdf]

Figure S3

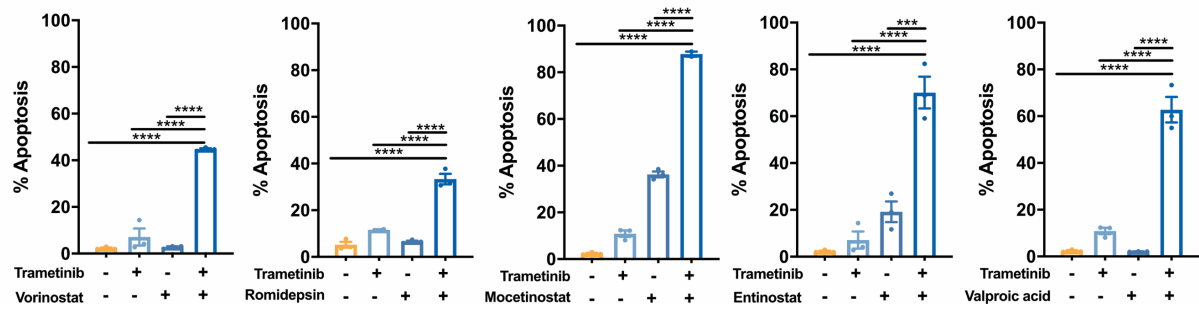

**Figure S3. MEK/HDAC inhibition induces apoptosis in CRC cells.** COLO 201 cells were treated with trametinib (10 nM) alone and in combination with vorinostat (2.5  $\mu$ M), romidepsin (10 nM), mocetinostat (2.5  $\mu$ M), entinostat (2.5  $\mu$ M), or valproic acid (2.5 mM) for 72 hours and apoptosis induction determined by propidium iodide staining and FACS analysis. Values shown are mean  $\pm$  SEM from a single experiment performed in technical triplicate. Similar results were obtained in two additional independent experiments. One-Way ANOVA, with Tukey's multiple comparison testing; \*\*\*\* ( $p \leq 0.0001$ ).
