# Supplementary material for: Genotype-Tailored ERK/MAPK Pathway and HDAC Inhibition Rewires the Apoptotic Rheostat to Trigger Colorectal Cancer Cell Death
Source: PubMed Central journal article supplement — Mol Cancer Ther. 2022 Nov 7;22(1):52–62. doi: 10.1158/1535-7163.MCT-22-0101 (PMC9808369; doi:10.1158/1535-7163.mct-22-0101), 2022-11-07
Supplement: mct-22-0101_figure_s4_suppsf4.pdf [file mct-22-0101_figure_s4_suppsf4.pdf]

## Figure S4

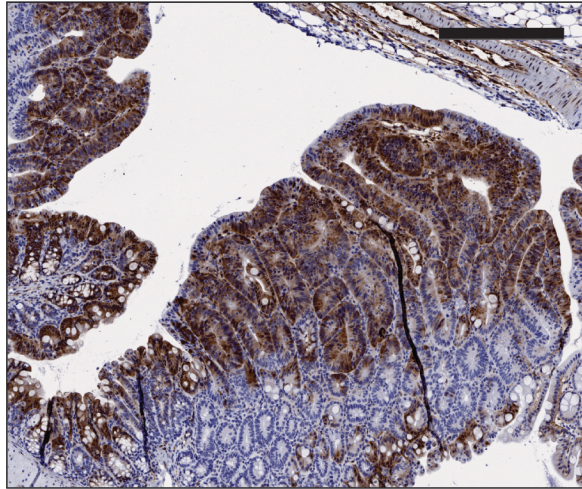

**p-ERK**

**Figure S4.** Representative immunostaining of p-ERK in colonic adenomas and adjacent normal epithelium from *Apc<sup>lox/lox</sup>;Cdx2-Cre<sup>ERT2</sup>* mice. Scale bar = 300  $\mu$ M
