# Supplementary material for: Genotype-Tailored ERK/MAPK Pathway and HDAC Inhibition Rewires the Apoptotic Rheostat to Trigger Colorectal Cancer Cell Death
Source: PubMed Central journal article supplement — Mol Cancer Ther. 2022 Nov 7;22(1):52–62. doi: 10.1158/1535-7163.MCT-22-0101 (PMC9808369; doi:10.1158/1535-7163.mct-22-0101), 2022-11-07
Supplement: mct-22-0101_figure_s5_suppsf5.pdf [file mct-22-0101_figure_s5_suppsf5.pdf]

Figure S5

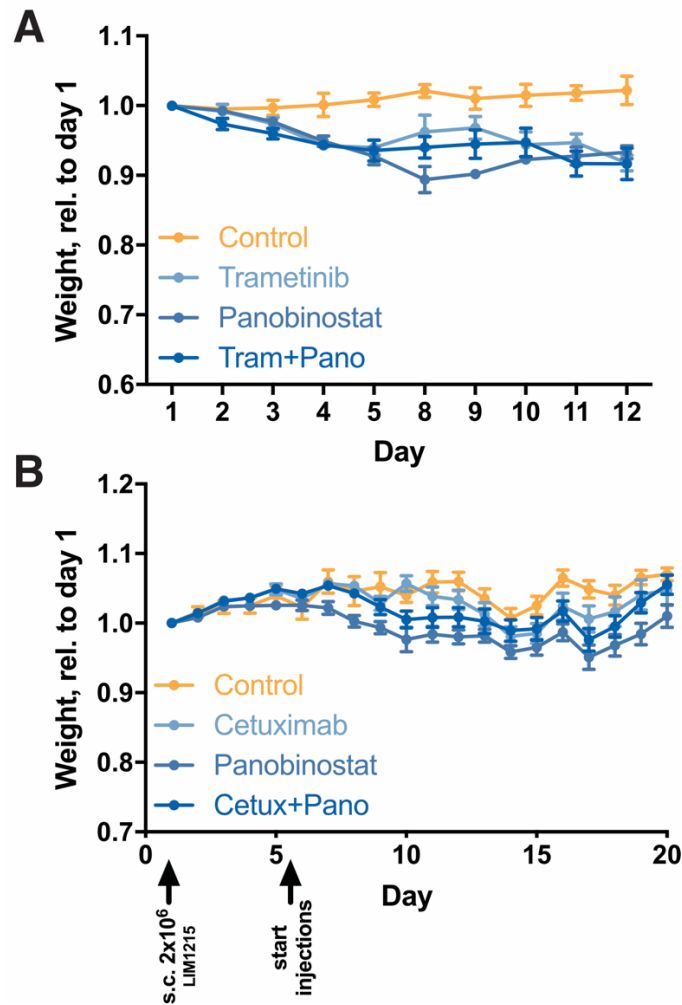

**Figure S5. Effect of MEK/HDAC and EGFR/HDAC inhibition on body weight.** Relative mouse weight change compared from commencement of treatment in (A) *Apc<sup>lox/lox</sup>;Cdx-Cre<sup>ERT2</sup>* mice treated with vehicle control (n=5), trametinib (n=4), panobinostat (n=5) and combination (n=8) treated mice and (B) BALB/c nude mice harbouring LIM1215 xenografts and treated with vehicle control (n=5), cetuximab (n=6), panobinostat (n=5) or the combination (n=6). Error bars represent mean ± SEM.
